# Supplementary material for: Functional calcium-responsive parathyroid glands generated using single-step blastocyst complementation
Source: PubMed Central journal article supplement — Proc Natl Acad Sci U S A. 2023 Jun 28;120(28):e2216564120. doi: 10.1073/pnas.2216564120 (PMC10334775; doi:10.1073/pnas.2216564120), 2023-06-28
Supplement: pnas.2216564120.sapp.pdf [file pnas.2216564120.sapp.pdf]

## Supporting Information for

# Functional calcium-responsive parathyroid glands generated using single-step blastocyst complementation

Mayuko Kano<sup>1,2,3</sup>, Naoaki Mizuno<sup>1,2</sup>, Hideyuki Sato<sup>1,2</sup>, Takaharu Kimura<sup>4</sup>, Rei Hirochika<sup>4</sup>, Yasumasa Iwasaki<sup>5,6</sup>, Naoko Inoshita<sup>7</sup>, Hisato Nagano<sup>1,2,8</sup>, Mariko Kasai<sup>1,2</sup>, Hiromi Yamamoto<sup>1,2</sup>, Tomoyuki Yamaguchi<sup>2,9</sup>, Hidetaka Suga<sup>10</sup>, Hideki Masaki<sup>1,2</sup>, \*Eiji Mizutani<sup>1,2,4</sup>, and \*Hiromitsu Nakauchi<sup>1,2,11</sup>

<sup>1</sup>Stem Cell Therapy Laboratory, Advanced Research Institute, Tokyo Medical and Dental University (TMDU), 1-5-45 Yushima, Bunkyo-Ku, Tokyo 113-8510, Japan

<sup>2</sup>Division of Stem Cell Therapy, Center for Stem Cell Biology and Regenerative Medicine, Institute of Medical Science, University of Tokyo, 4-6-1 Shirokanedai, Minato-ku, Tokyo 108-8639, Japan

<sup>3</sup>Metabolism and Endocrinology, Department of Medicine, St. Marianna University School of Medicine, 2-16-1 Sugao, Miyamae-ku, Kawasaki, Kanagawa 216-8511, Japan

<sup>4</sup>Laboratory of Stem Cell Therapy, Institute of Medicine, University of Tsukuba, 1-1-1 Tennodai, Tsukuba 305-8577, Japan

<sup>5</sup>Department of Clinical Nutrition, Faculty of Health Science, Suzuka University of Medical Science, 1001-1 Kishioka-cho, Suzuka, Mie 510-0293, Japan

<sup>6</sup>Department of Endocrinology, Metabolism, and Nephrology, Kochi Medical School, Kochi University, 185-1 Kohasu, Oko-cho, Nankoku, Kochi 783-8505, Japan

<sup>7</sup> Department of Pathology, Moriyama Memorial Hospital, 4-3-1 Kitakasai, Edogawa-ku, Tokyo 134-0081, Japan

<sup>8</sup>Department of Plastic and Reconstructive Surgery, National Defense Medical College, 3-2

Namiki, Tokorozawa, Saitama 359-8513, Japan

<sup>9</sup>Laboratory of Regenerative Medicine, Tokyo University of Pharmacy and Life Science,  
1432-1 Horinouchi, Hachioji, Tokyo 192-0392, Japan

<sup>10</sup>Department of Endocrinology and Diabetes, Nagoya University Graduate School of  
Medicine, 65 Tsurumai-cho, Showa-ku, Nagoya 466-8550, Japan

<sup>11</sup>Institute for Stem Cell Biology and Regenerative Medicine, Stanford University School of  
Medicine, Sanford, CA 94305, USA

**\*To whom correspondence should be addressed**

**Hiromitsu Nakauchi, M.D., Ph.D.**

Institute for Stem Cell Biology and Regenerative Medicine  
Stanford University School of Medicine, Sanford, CA 94305, USA  
Tel: +1-650-497-4365  
Fax: +1-650-497-5794  
E-mail: [nakauchi@stanford.edu](mailto:nakauchi@stanford.edu)

**Eiji Mizutani, Ph.D.**

Laboratory of Stem Cell Therapy, Institute of Medicine  
University of Tsukuba, 1-1-1 Tennodai, Tsukuba 305-8577, Japan.  
Tel: +81-29-853-3287,  
Fax: +81-29-853-3115  
E-mail: [emizutani@md.tsukuba.ac.jp](mailto:emizutani@md.tsukuba.ac.jp)

**This PDF file includes:**

Figures S1 to S6

Tables S1 to S3

## Supplementary Figure Legends

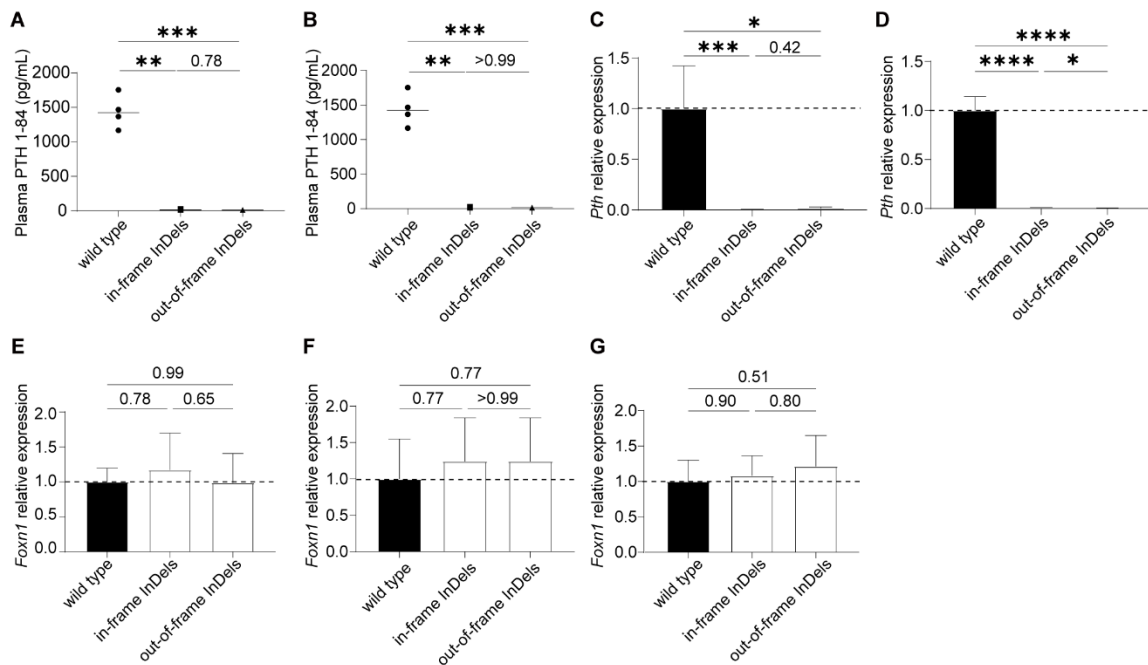

### Supplementary Figure 1 (S1). Phenotypes of *Gcm2* KO mice on different genetic backgrounds.

(A) Plasma PTH levels in wild type and *Gcm2* mutant mice on C57BL/6N (B6) background. Wild type, n=5. *Gcm2* mutants with in-frame InDels, n=6. *Gcm2* mutants with out-of-frame InDels, n=6. (B) Plasma PTH levels in wild type and *Gcm2* mutant mice on B6 × DBA/2 (BDF1) background. Wild type, n=10. *Gcm2* mutants with in-frame InDels, n=12. *Gcm2* mutants with out-of-frame InDels, n=5. (C) *Pth* mRNA expression in wild type and *Gcm2* mutant mice on the B6 background. Wild type, n=5. *Gcm2* mutants with in-frame InDels, n=6. *Gcm2* mutants with out-of-frame InDels, n=12. (D) *Pth* mRNA expression in wild type and *Gcm2* mutant mice on BDF1 background. Wild type, n=7. *Gcm2* mutants with in-frame InDels, n=5. *Gcm2* mutants with out-of-frame InDels, n=6. (E) *Foxn1* mRNA expression in wild type and *Gcm2* mutant mice on B6 background. Wild type, n=5. *Gcm2* mutants with in-frame InDels, n=6. *Gcm2* mutants with out-of-frame InDels, n=12. (F) *Foxn1* mRNA expression in wild type and *Gcm2* mutant mice on B6D2F1 × B6 (BDF1B6) background. Wild type, n=6. *Gcm2* mutants with in-frame InDels, n=5. *Gcm2* mutants with out-of-frame InDels, n=5. (G) *Foxn1* mRNA expression in wild type and *Gcm2*-mutant mice on BDF1 background. Wild type, n=8. *Gcm2* mutants with in-frame InDels, n=5. *Gcm2* mutants with out-of-frame InDels, n=5. (C–G) Graphed

values, mean with s.d. \*  $P \leq 0.05$ , \*\*  $P \leq 0.01$ , \*\*\*  $P \leq 0.001$ , \*\*\*\*  $P \leq 0.0001$  using one sample t-test and Mann Whitney test with Bonferroni's correction (**A**), Brown-Forsythe ANOVA test with Dunnett's T3 multiple comparisons test (**B**, **D**), Kruskal-Wallis test with Dunn's multiple comparisons test (**C**), one-way ANOVA test with Tukey's multiple comparisons test (**E–G**).

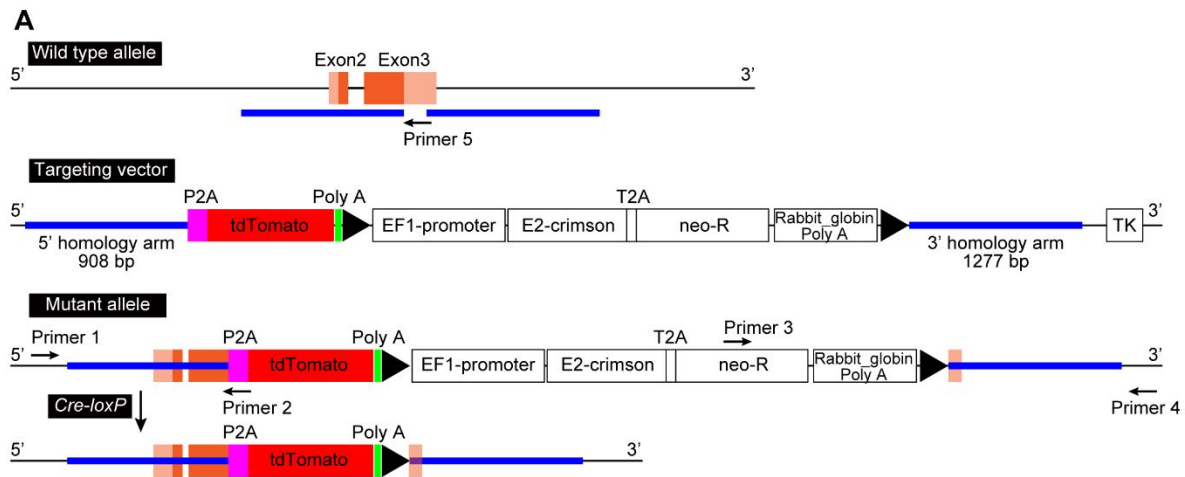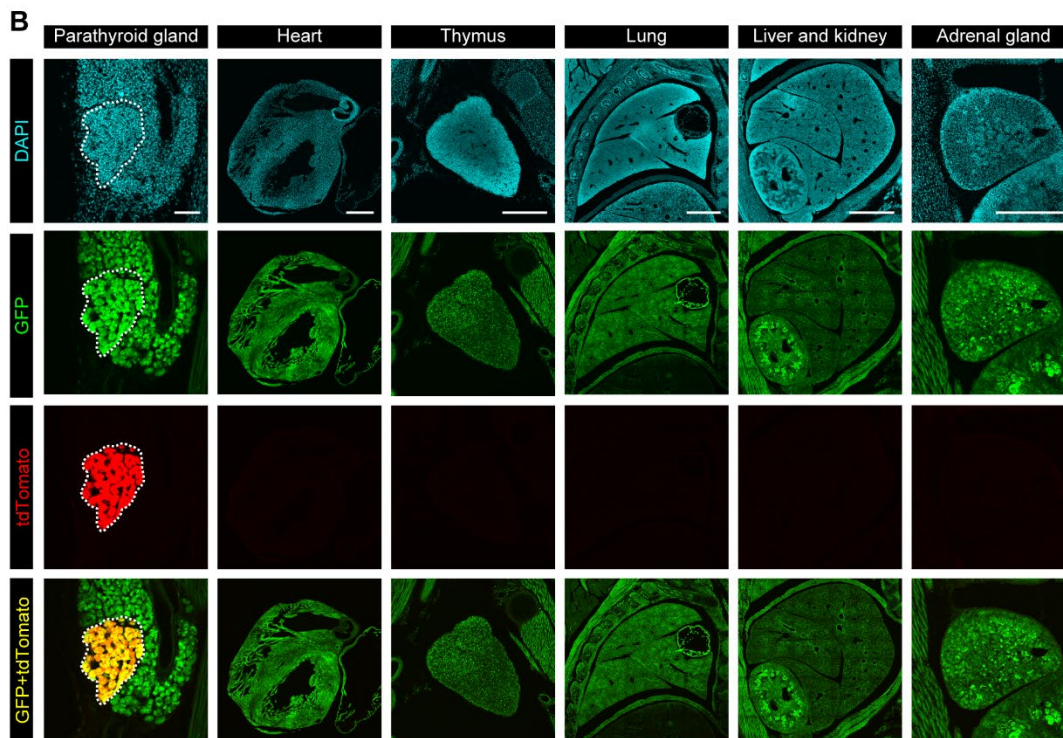

**Supplementary Figure 2 (S2). Characteristics of chimeric mice derived from Pth-tdTomato mESCs.**

(A) Generation of tdTomato – knock-in mESCs at *Pth* locus (*C57BL/6N-Tg(CAG-EGFP)Pth<sup>tm1(P2A-tdTomato)</sup>ES1*). Targeting vector construction and targeting strategy.

(B) Immunostaining of various organs in chimeric mice with high chimerism (> 99%). Note absence of tdTomato expression outside PTGs.

DAPI (cyan), GFP (green), tdTomato (red). Scale bars: 100  $\mu$ m (PTG), 500  $\mu$ m (heart,

thymus, and adrenal gland), 1 mm (lung, liver, and kidney).

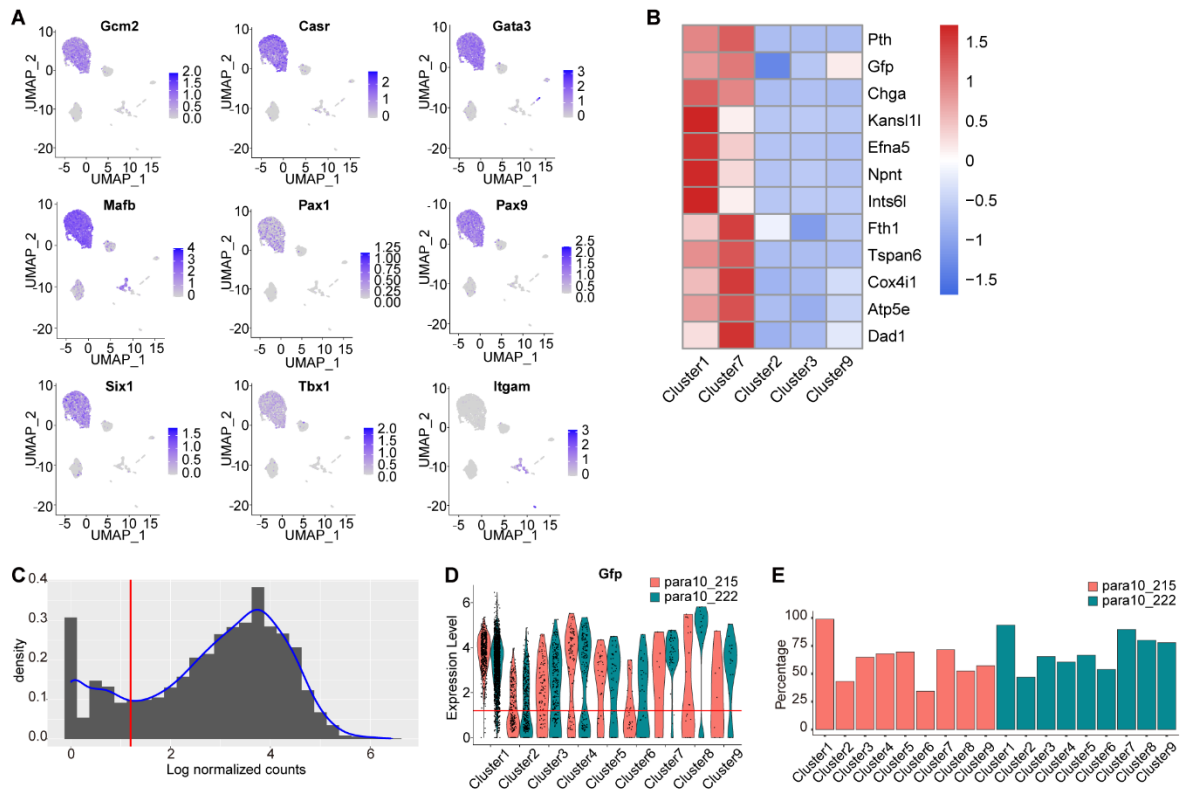

**Supplementary Figure 3 (S3). Single-cell RNA-seq findings of mESC-derived PTGs.** (A) Feature plots on the UMAP showing *Gcm2*, *Casr*, *GATA-binding protein 3 (Gata3)*, *v-maf musculoaponeurotic fibrosarcoma oncogene homolog B (MafB)*, *Paired box 1 (Pax1)*, *Pax9*, *Sine oculis homeobox 1 (Six1)*, *T-box transcription factor 1 (Tbx1)*, and *integrin alpha M (Itgam)* gene expression. (B) Heatmap based on cluster markers. (C) Histogram based on normalized *Gfp* count data, all cells. Blue, density curve. Red, threshold between *Gfp*-high and *Gfp*-low (|cutoff for *Gfp* expression). (D) Violin plots displaying *Gfp* expression for each experiment. Red line, threshold as in (C). (E) Percentage, based on threshold, of *Gfp* expression for each experiment.

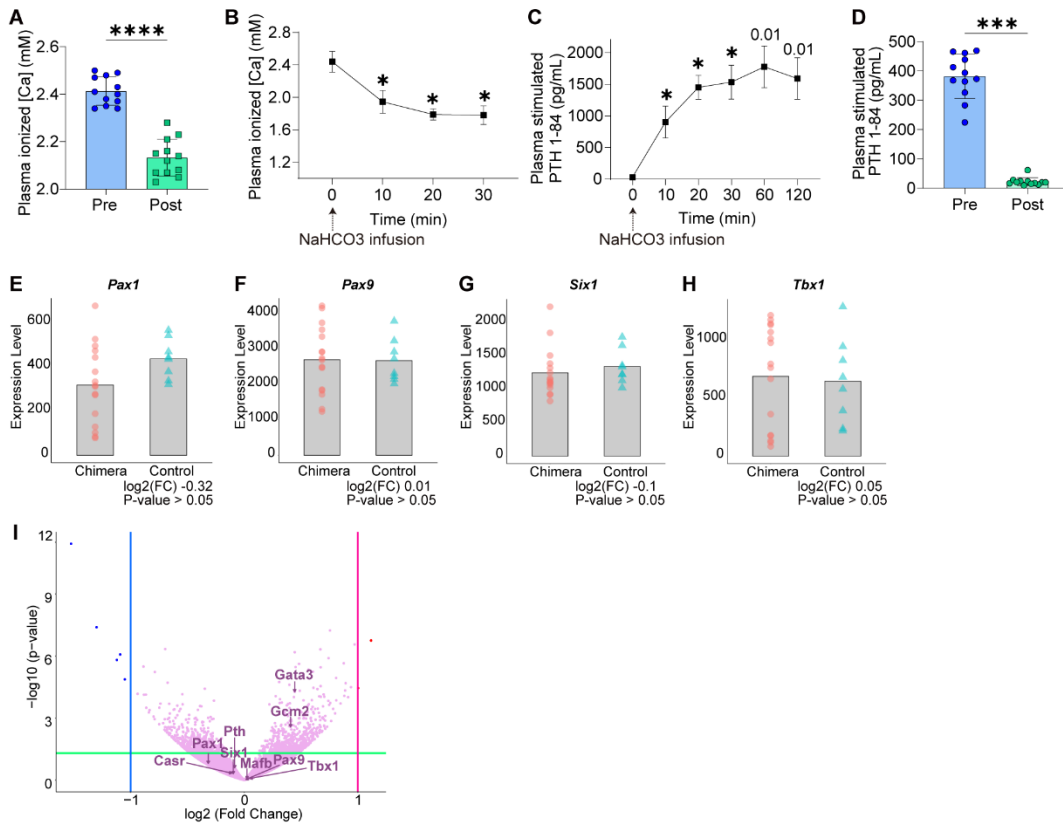

### Supplementary Figure 4 (S4). Characterization of mESC-derived PTGs.

(A) Plasma [Ca] pre- and post-parathyroidectomy in C57BL/6-*Pth<sup>tm1(P2A-tdTomato)</sup>* mice. n=12. (B, C) Changes in plasma ionized [Ca] (B) and PTH 1-84 (C) upon sodium bicarbonate infusion test in wild type B6 mice. All points, n=5 (B). 0 min, n=6. 10min, n=6. 20 min, n=3. 30 min, n=6. 60 min, n=3. 120 min, n=3 (C). (D) Plasma stimulated PTH 1-84 levels pre- and post-parathyroidectomy in C57BL/6-*Pth<sup>tm1(P2A-tdTomato)</sup>* mice. n=12. Same samples as (A). (E–H) Bulk RNA-seq data of PTG cells. Differentially expressed genes (DEG) analysis using DESeq2. log<sub>2</sub>(FC) means fold changes of chimera gene counts against control (C57BL/6-*Pth<sup>tm1(P2A-tdTomato)</sup>*<sup>+/+</sup> mouse). (I) Volcano plot from log<sub>2</sub>(FC) and p-value. DEGs are highlighted as red or blue dots ( $|\log_2\text{FC}| > 1, p\text{-value} < 0.05$ ). \*  $P \leq 0.05$ , \*\*\*  $P \leq 0.001$ , \*\*\*\*  $P \leq 0.0001$  using Wilcoxon test (A), paired t-tests with Bonferroni's correction (B, C), and paired t-test (D).



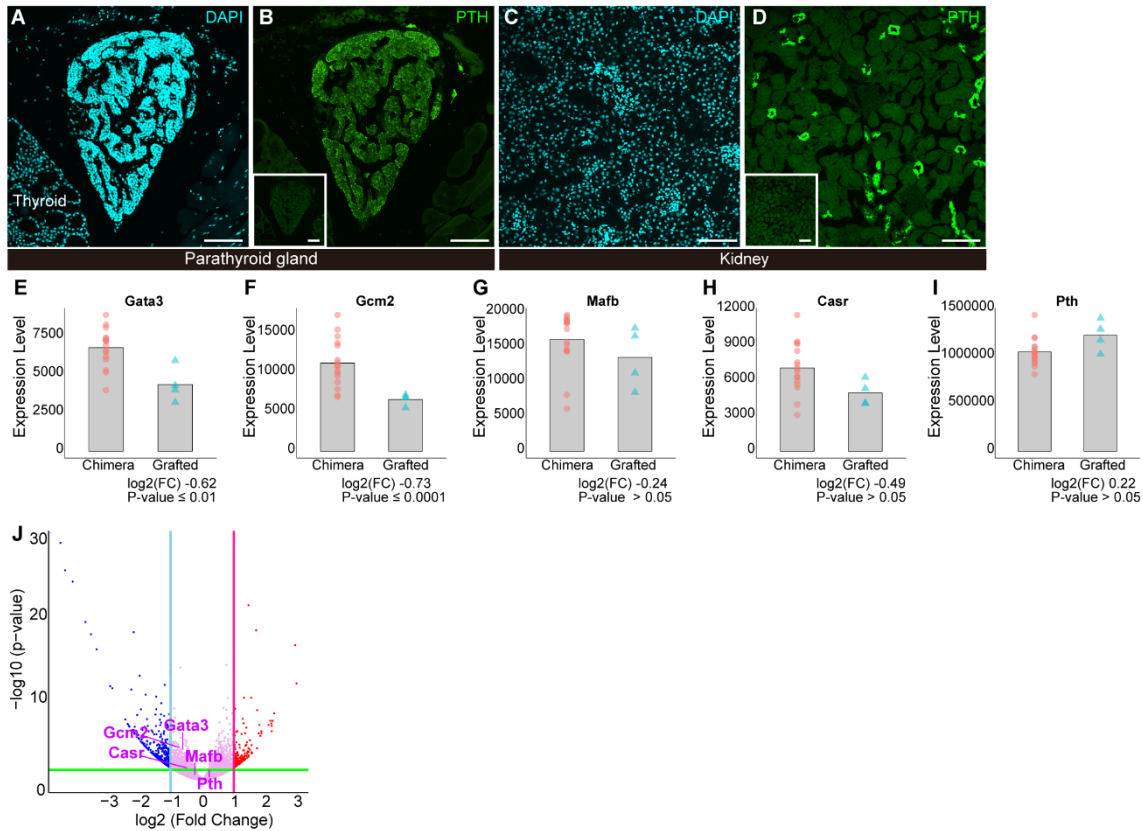

**Supplementary Figure 5 (S5). Immunohistochemical and bulk RNA-seq findings in grafted mESC-derived PTGs.**

(A–D) Parathyroid gland and kidney of wild type B6 mouse stained with anti-PTH antibody (ab213557, Abcam). The left lower panels in (B) and (D) show secondary antibody-only controls. Staining of kidney is non-specific (D). DAPI (cyan; A and C), PTH (green; B and D). Scale bars: 100  $\mu\text{m}$ .

(E–I) Bulk RNA-seq data of grafted PTG cells. Differentially expressed genes analysis using DESeq2.  $\log_2(\text{FC})$  means fold changes of grafted mESC-derived PTG cells gene counts against primary PTG cells (primary PTG cells, same samples as in Figure 3). Two weeks after renal subcapsular transplantation of mESC-derived PTG, the graft was removed and tdTomato-positive cells were sampled. (J) Volcano plot from  $\log_2(\text{FC})$  and p-value.

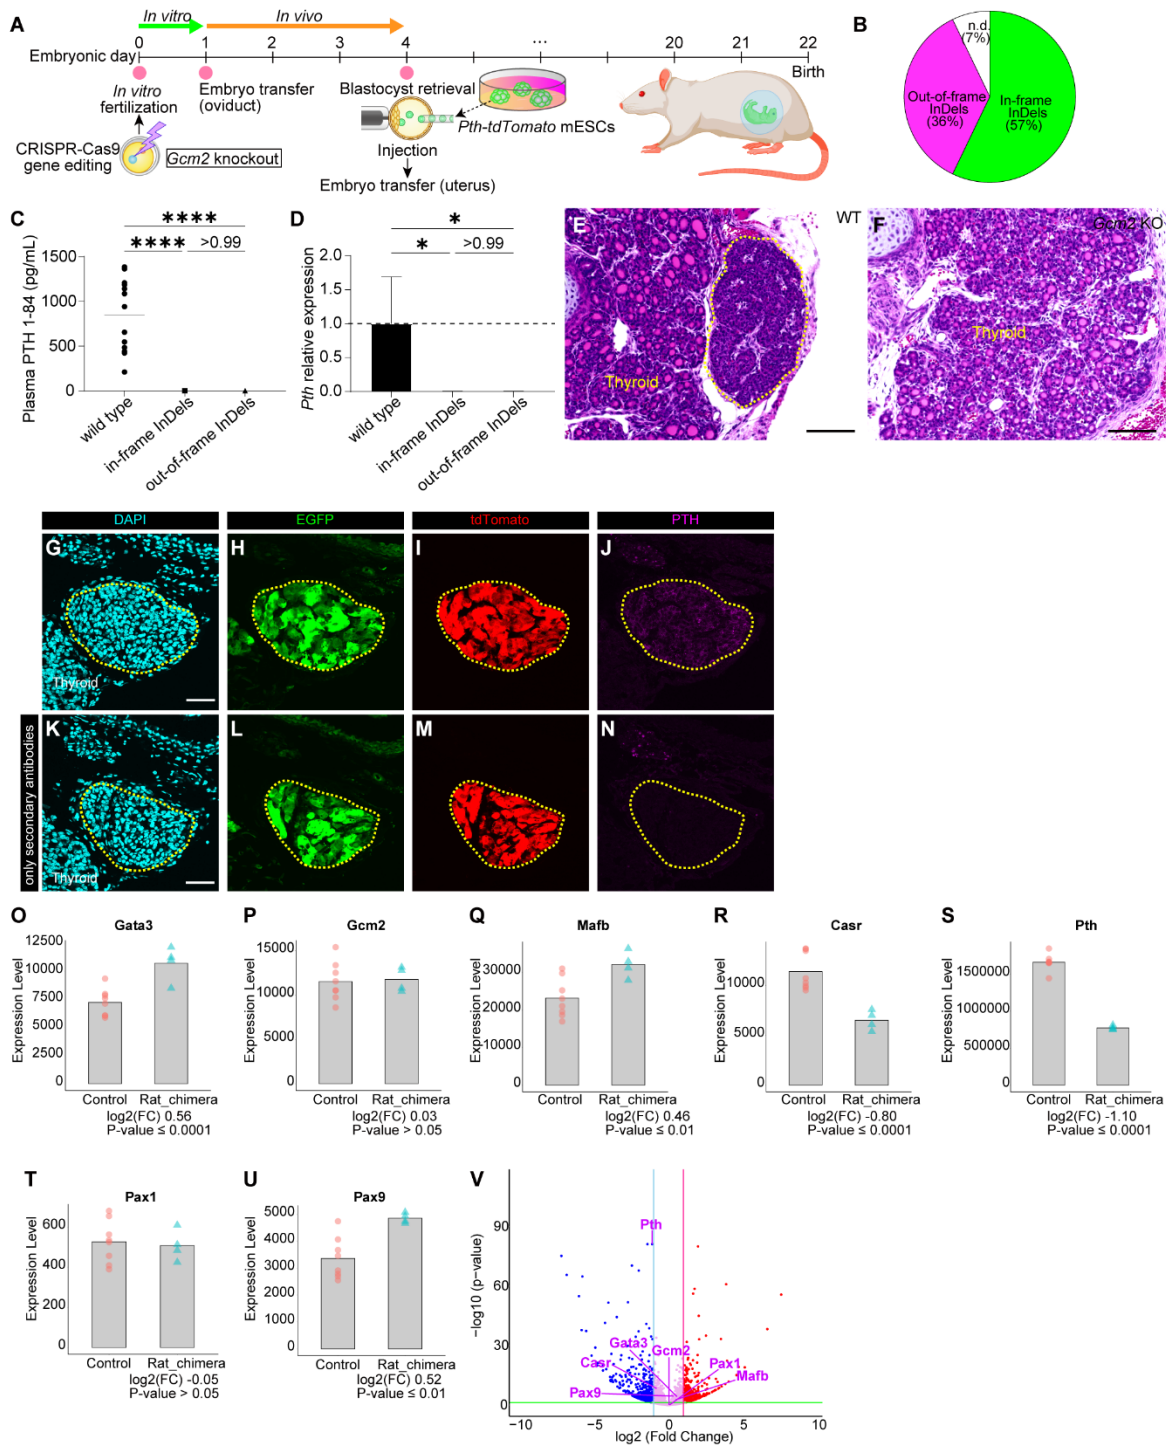

**Supplementary Figure 6 (S6). Generation by interspecies BC of mESC-derived PTGs in *Gcm2* KO rat neonates.**

(A) Strategy for single-step interspecies BC generation of mESC-derived PTGs in *Gcm2* KO rats. (B) Genotypes of *Gcm2* mutant newborns in rats. (C) Plasma PTH 1-84 levels in wild type Wistar rats and *Gcm2*<sup>-/-</sup> rats at the neonatal stage. Wild type, n=13. *Gcm2* mutants with in-frame InDels, n=11. *Gcm2*<sup>-/-</sup> rats with out-of-frame InDels, n=9. (D) *Pth* mRNA expression in wild type Wistar rats and *Gcm2*<sup>-/-</sup> rat neonates. Wild type, n=5. *Gcm2*<sup>-/-</sup> rats with in-frame InDels, n=5. *Gcm2*<sup>-/-</sup> rats with out-of-frame InDels, n=5. Graphed values, mean with s.d. (E, F) HE sections of wild type Wistar rats (E) and *Gcm2*<sup>-/-</sup> rats with out-of-frame deletion (F). Yellow dotted lines indicate PTGs. Scale bars: 100 μm. (G–N) Immunostaining of mESC-derived PTGs in the *Gcm2*<sup>-/-</sup> rat (G–J) and only secondary antibodies controls (K–N). Yellow dotted lines indicate PTGs. DAPI (cyan; G, K), GFP (green; H, L), tdTomato (red; I, M), PTH (magenta; J, N). Yellow dotted lines indicate PTGs. Scale bars: 100 μm. (O–U) Bulk RNA-seq data of mESC-derived PTGs in the *Gcm2*<sup>-/-</sup> rat. Differentially expressed genes analysis using DESeq2. log<sub>2</sub>(FC) means fold changes of gene counts of mESC-derived PTGs in *Gcm2*<sup>-/-</sup> rat (“Rat\_chimera”) against control (C57BL/6-*Pth*<sup>tm1(P2A-tdTomato)</sup><sup>+/+</sup> mouse). Same samples as in Figure 3. (V) Volcano plot from log<sub>2</sub>(FC) and p-value.

\*  $P \leq 0.05$ , \*\*\*\*  $P \leq 0.0001$ , n.s., not significant using Kruskal-Wallis test with Dunn’s multiple comparisons test (C, D).

## Supplementary Tables

**Table S1. Neonatal survival of *Gcm2* mutant pups on BDF1B6 background.**

|                      | Living<br>fetuses | Genotypes of <i>Gcm2</i> mutants |              |      |                      |              |      |
|----------------------|-------------------|----------------------------------|--------------|------|----------------------|--------------|------|
|                      |                   | Biallelic                        |              |      | Mosaic               |              |      |
|                      |                   | Out-<br>of-<br>frame             | In-<br>frame | Both | Out-<br>of-<br>frame | In-<br>frame | Both |
| At birth             | 22                | 8                                | 8            | 5    | 1                    | 0            | 0    |
| Second postnatal day | 1                 | 1                                | 0            | 0    | 0                    | 0            | 0    |

**Table S2. Count data, *Gfp*-high and *Gfp*-low expression, each cluster.**

| Cluster | Total counts | Counts,<br><i>Gfp</i> -high expression | Counts,<br><i>Gfp</i> -low expression | Percentage of<br><i>Gfp</i> -high expression |
|---------|--------------|----------------------------------------|---------------------------------------|----------------------------------------------|
| 1       | 2604         | 2463                                   | 141                                   | 94.6                                         |
| 2       | 684          | 312                                    | 372                                   | 45.6                                         |
| 3       | 385          | 251                                    | 134                                   | 65.2                                         |
| 4       | 288          | 182                                    | 106                                   | 63.2                                         |
| 5       | 87           | 59                                     | 28                                    | 67.8                                         |
| 6       | 74           | 33                                     | 41                                    | 44.6                                         |
| 7       | 55           | 48                                     | 7                                     | 87.3                                         |
| 8       | 36           | 23                                     | 13                                    | 63.9                                         |
| 9       | 25           | 18                                     | 7                                     | 72.0                                         |

**Table S3. *Gcm2* knock-out efficiency in Wistar rat offspring after zygote genome editing using CRISPR-Cas9.**

| Strain | Embryos transferred | Living fetuses | Genotypes of <i>Gcm2</i> mutants |          |           |              |          |        |   |   |      |
|--------|---------------------|----------------|----------------------------------|----------|-----------|--------------|----------|--------|---|---|------|
|        |                     |                | Monoallelic                      |          | Biallelic |              |          | Mosaic |   |   | n.d. |
|        |                     |                | Out-of-frame                     | In-frame | Both      | Out-of-frame | In-frame | Both   |   |   |      |
| Wistar | 120                 | 14             | 0                                | 5        | 5         | 3            | 0        | 0      | 0 | 1 |      |

Those that could not be amplified by crude PCR with the mouse primer pairs were described as n.d.
